# Supplementary material for: Green and Efficient Ultrasonic-Assisted Extraction of Bioactive Components from Salvia miltiorrhiza by Natural Deep Eutectic Solvents
Source: PubMed Central journal article supplement (PMC6983008; doi:10.3390/molecules25010140), 2019-12-29

# Green and Efficient Ultrasonic-Assisted Extraction of Bioactive Components from *Salvia miltiorrhiza* by Natural Deep Eutectic Solvents

Xinping He<sup>#, 1</sup>, Jiehong Yang<sup>#, 1</sup>, Yan Huang,<sup>1</sup> Yin Zhang,<sup>1</sup> Haitong Wan\*,<sup>1</sup> Chang Li\*<sup>1</sup>

<sup>1</sup> Zhejiang Chinese Medical University, Hangzhou, 310057, PR China

# These authors contributed equally in this work.

\* Corresponding Authors

## *Supporting information*

| <b>Table of contents</b>                                                                            | <b>Page</b> |
|-----------------------------------------------------------------------------------------------------|-------------|
| Table S1. Calibration curves and test ranges for analytes by HPLC                                   | 2           |
| Table S2. Bioactive components extraction yields from SM using NaDESs and traditional solvents      | 3           |
| Table S3. Bioactive components extraction yields from SM using L-Pro-acid type NaDESs               | 4           |
| Table S4. Bioactive components extraction yields from SM using L-Pro-Lac under different conditions | 5           |
| Table S5. Bioactive components extraction yields from SM from different origins using L-Pro-Lac     | 6           |
| Table S6. DPPH radical scavenging activities of selected SM extracts using NaDESs                   | 7           |
| Figure S1-S6. Representative HPLC chromatograms of SM extracts                                      | 8-10        |

Table S1. Calibration curves and test ranges for analytes by HPLC

| No.  | Wavelength<br>(nm) | Calibration Curve | R <sup>2</sup> | Linear Range                           |
|------|--------------------|-------------------|----------------|----------------------------------------|
|      |                    |                   |                | ( $\mu\text{g} \cdot \text{mL}^{-1}$ ) |
| SAB  | 280                | Y=14.226X-349.59  | 0.9997         | 100.00-500.00                          |
| TIIA | 254                | Y=82.605X+42.706  | 0.9995         | 1.250-30.000                           |
| CYT  | 254                | Y=94.560X+51.3    | 0.9997         | 1.250-20.000                           |

Table S2. Bioactive components extraction yields from SM using NaDESs and traditional solvents (the first-round screening, Figure 2, values are expressed as mean  $\pm$  SD)

| Solvent   | SAB<br>(mg/g)      | TIIA<br>(mg/g)    | CYT<br>(mg/g)     |
|-----------|--------------------|-------------------|-------------------|
| ChCl-Glu  | 33.980 $\pm$ 2.038 | 0.435 $\pm$ 0.094 | 0.312 $\pm$ 0.012 |
| ChCl-Gly  | 41.830 $\pm$ 2.639 | 0.649 $\pm$ 0.064 | 0.373 $\pm$ 0.103 |
| ChCl-Lac  | 35.450 $\pm$ 1.032 | 0.125 $\pm$ 0.084 | 0.340 $\pm$ 0.013 |
| ChCl-Ur   | 17.960 $\pm$ 1.347 | <0.125            | <0.125            |
| Bet-Glu   | 38.030 $\pm$ 2.584 | 0.945 $\pm$ 0.024 | 0.433 $\pm$ 0.122 |
| Bet-Gly   | 39.660 $\pm$ 3.238 | 1.045 $\pm$ 0.146 | 0.530 $\pm$ 0.127 |
| Bet-Lac   | 39.610 $\pm$ 1.674 | 0.268 $\pm$ 0.003 | 0.284 $\pm$ 0.037 |
| Bet-Ur    | 32.490 $\pm$ 1.367 | 0.301 $\pm$ 0.019 | 0.168 $\pm$ 0.028 |
| L-Pro-Glu | 37.670 $\pm$ 2.221 | 0.569 $\pm$ 0.025 | 0.227 $\pm$ 0.014 |
| L-Pro-Gly | 38.730 $\pm$ 1.034 | 1.307 $\pm$ 0.145 | 0.613 $\pm$ 0.131 |
| L-Pro-Lac | 42.035 $\pm$ 2.070 | 1.485 $\pm$ 0.361 | 0.839 $\pm$ 0.121 |
| L-Pro-Ur  | 32.060 $\pm$ 2.383 | 0.332 $\pm$ 0.026 | 0.222 $\pm$ 0.002 |
| D-Pro-Glu | 39.420 $\pm$ 2.063 | 0.695 $\pm$ 0.128 | 0.264 $\pm$ 0.003 |
| D-Pro-Gly | 34.780 $\pm$ 3.248 | 1.049 $\pm$ 0.004 | 0.507 $\pm$ 0.028 |
| D-Pro-Lac | 33.930 $\pm$ 1.783 | 0.873 $\pm$ 0.038 | 0.568 $\pm$ 0.023 |
| D-Pro-Ur  | 38.740 $\pm$ 3.285 | 0.428 $\pm$ 0.032 | 0.285 $\pm$ 0.015 |
| water     | 28.782 $\pm$ 1.284 | <0.125            | <0.125            |
| methanol  | 19.665 $\pm$ 1.872 | 1.788 $\pm$ 0.036 | 0.761 $\pm$ 0.126 |

Table S3. Bioactive components extraction yields from SM using L-Pro-acid type NaDESs

(the second-round screening, Figure 3, values are expressed as mean  $\pm$  SD)

| Solvent   | SAB<br>(mg/g)      | TIIA<br>(mg/g)    | CYT<br>(mg/g)     |
|-----------|--------------------|-------------------|-------------------|
| L-Pro-Ca  | 36.424 $\pm$ 3.754 | <0.125            | <0.125            |
| L-Pro-Maa | 29.523 $\pm$ 1.920 | 0.625 $\pm$ 0.150 | 0.342 $\pm$ 0.170 |
| L-Pro-Mal | 34.608 $\pm$ 2.510 | 0.535 $\pm$ 0.171 | 0.340 $\pm$ 0.147 |
| L-Pro-Suc | 36.658 $\pm$ 1.843 | 0.129 $\pm$ 0.030 | 0.203 $\pm$ 0.127 |
| L-Pro-Tar | 33.705 $\pm$ 4.525 | <0.125            | <0.125            |
| L-Pro-Aa  | 32.621 $\pm$ 2.331 | 0.247 $\pm$ 0.082 | 0.186 $\pm$ 0.085 |
| L-Pro-Lac | 42.035 $\pm$ 2.070 | 1.484 $\pm$ 0.361 | 0.839 $\pm$ 0.121 |

Table S4. Bioactive components extraction yields from SM using L-Pro-Lac under different conditions ( Figure 4, values are expressed as mean  $\pm$  SD)

| Extraction Condition                           |     | SAB<br>(mg/g)      | TIIA<br>(mg/g)    | CYT<br>(mg/g)     |
|------------------------------------------------|-----|--------------------|-------------------|-------------------|
| A.<br>S/L Ratio<br>(mg/mL)                     | 50  | 32.290 $\pm$ 2.392 | 1.801 $\pm$ 0.113 | 0.567 $\pm$ 0.013 |
|                                                | 100 | 42.035 $\pm$ 2.070 | 1.484 $\pm$ 0.361 | 0.839 $\pm$ 0.121 |
|                                                | 150 | 35.360 $\pm$ 2.308 | 0.539 $\pm$ 0.136 | 0.388 $\pm$ 0.023 |
|                                                | 200 | 39.320 $\pm$ 2.113 | 0.218 $\pm$ 0.032 | 0.217 $\pm$ 0.031 |
| B.<br>Extraction<br>Temperature( $^{\circ}$ C) | 25  | 33.320 $\pm$ 2.308 | 0.218 $\pm$ 0.227 | 0.217 $\pm$ 0.011 |
|                                                | 50  | 42.035 $\pm$ 2.070 | 1.484 $\pm$ 0.361 | 0.839 $\pm$ 0.121 |
|                                                | 75  | 41.010 $\pm$ 2.112 | 1.184 $\pm$ 0.228 | 1.013 $\pm$ 0.139 |
| C.<br>Extraction<br>Time (min)                 | 15  | 38.460 $\pm$ 1.952 | 0.620 $\pm$ 0.053 | 0.893 $\pm$ 0.153 |
|                                                | 30  | 42.035 $\pm$ 2.070 | 1.484 $\pm$ 0.361 | 0.839 $\pm$ 0.121 |
|                                                | 60  | 38.050 $\pm$ 2.372 | 0.780 $\pm$ 0.224 | 0.878 $\pm$ 0.104 |
| D.<br>DES Content (%)                          | 0   | 28.780 $\pm$ 1.985 | <0.125            | <0.125            |
|                                                | 25  | 30.690 $\pm$ 2.219 | <0.125            | <0.125            |
|                                                | 50  | 30.540 $\pm$ 1.893 | 0.196 $\pm$ 0.006 | 0.353 $\pm$ 0.056 |
|                                                | 75  | 42.035 $\pm$ 2.070 | 1.484 $\pm$ 0.361 | 0.839 $\pm$ 0.121 |

Table S5. Bioactive components extraction yields from SM from different origins using NaDES-15 (L-Pro-Lac, Figure 5, values are expressed as mean  $\pm$  SD)

| SM origin | SAB<br>(mg/g)      | TIIA<br>(mg/g)    | CYT<br>(mg/g)     |
|-----------|--------------------|-------------------|-------------------|
| Hebei     | 41.424 $\pm$ 7.130 | 0.690 $\pm$ 0.288 | 0.291 $\pm$ 0.073 |
| Sichuang  | 22.334 $\pm$ 1.491 | 0.751 $\pm$ 0.333 | 0.778 $\pm$ 0.173 |
| Anhui     | 26.336 $\pm$ 2.724 | 0.482 $\pm$ 0.073 | 1.037 $\pm$ 0.107 |
| Yunnan    | 46.988 $\pm$ 2.579 | 0.326 $\pm$ 0.040 | 0.093 $\pm$ 0.081 |
| Shandong  | 42.035 $\pm$ 2.070 | 1.485 $\pm$ 0.361 | 0.839 $\pm$ 0.121 |

Table S6. DPPH radical scavenging activities of selected SM extracts using NaDESs

| Solvents                  | DPPH Scavenging Effect(%) |
|---------------------------|---------------------------|
|                           | Mean±SD                   |
| L-Pro-Lac                 | 87.481±1.775              |
| ChCl-Gly                  | 89.773±0.504              |
| Bet-Gly                   | 85.942±2.169              |
| Bet-Lac                   | 90.612±0.359              |
| water                     | 85.720±0.178              |
| methanol                  | 65.625±0.243              |
| Vitamin C<br>(0.05 mg/mL) | 65.154±2.761              |

Figure S1-S6. Representative HPLC chromatograms of SM extracts

Figure S1. HPLC chromatograms of SM extracts using water (wavelength=280 nm)

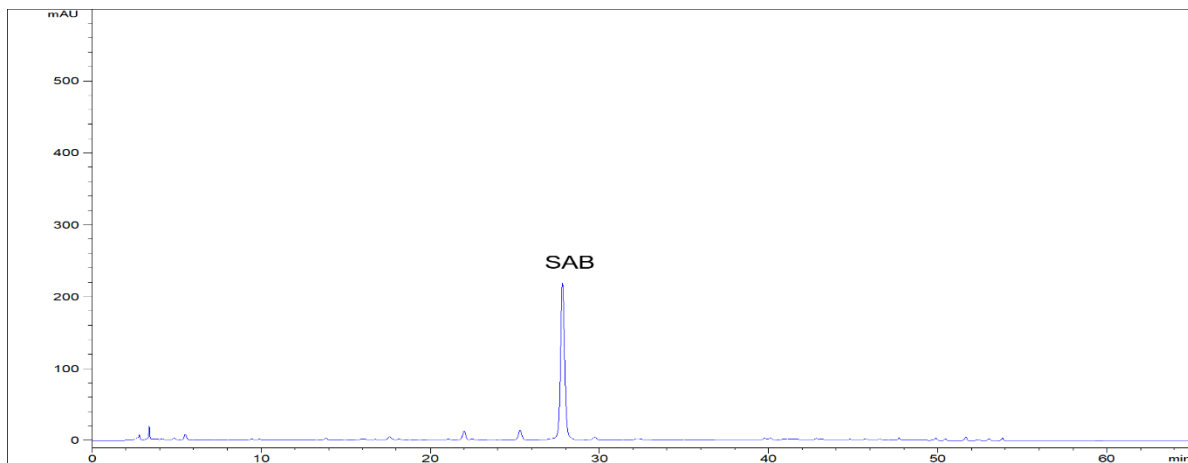

Figure S2. HPLC chromatograms of SM extracts using methanol (wavelength=280 nm)

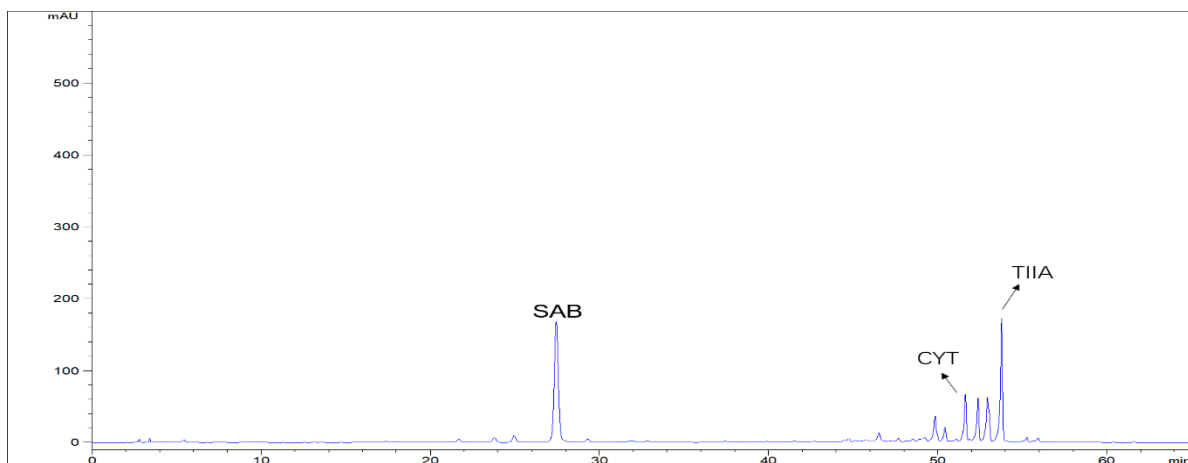



Figure S3. HPLC chromatograms of SM extracts using NaDES-2 (ChCl-Gly, wavelength=280 nm)

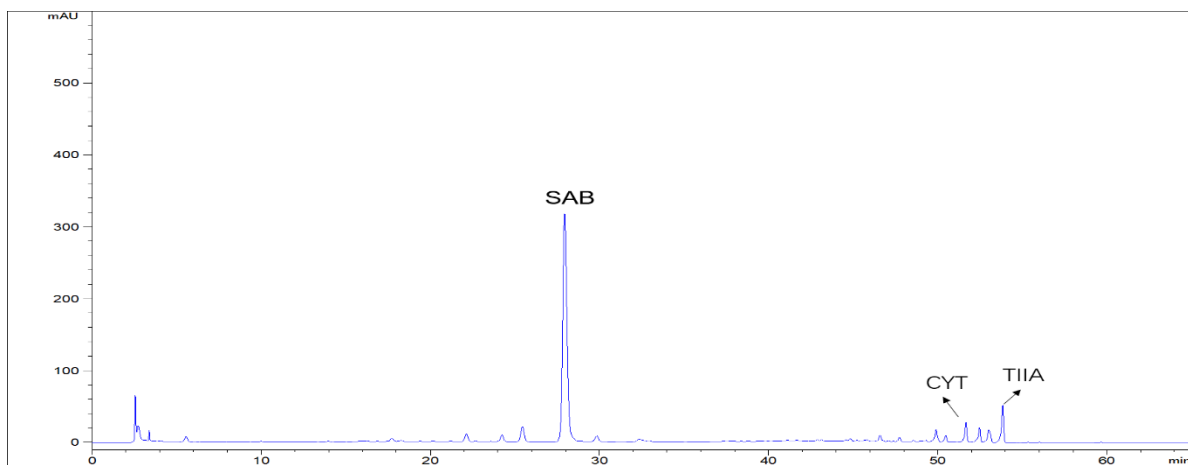

Figure S4. HPLC chromatograms of SM extracts using NaDES-6 (Bet-Gly, wavelength=280 nm)

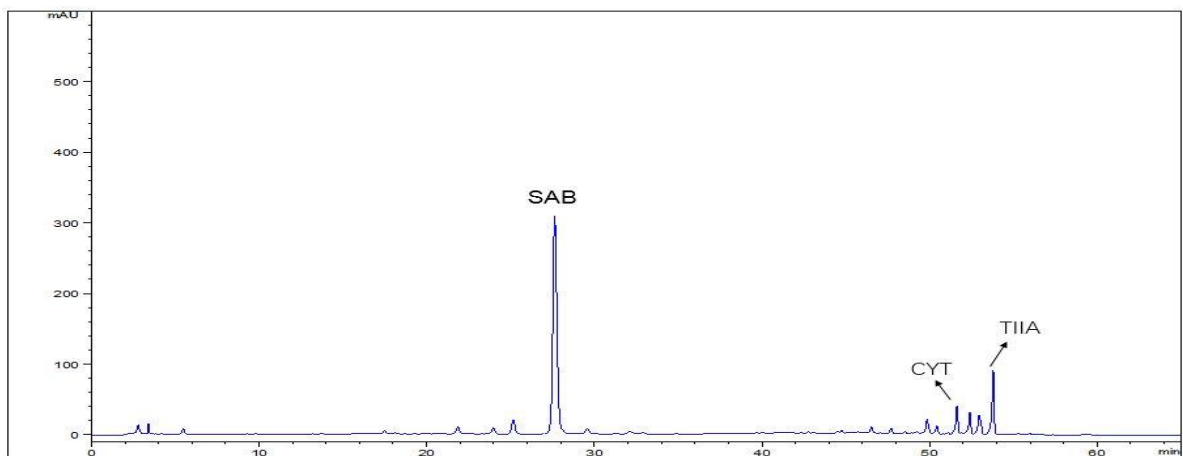

Figure S5. HPLC chromatograms of SM extracts using NaDES-7 (Bet-Lac, wavelength=280 nm)

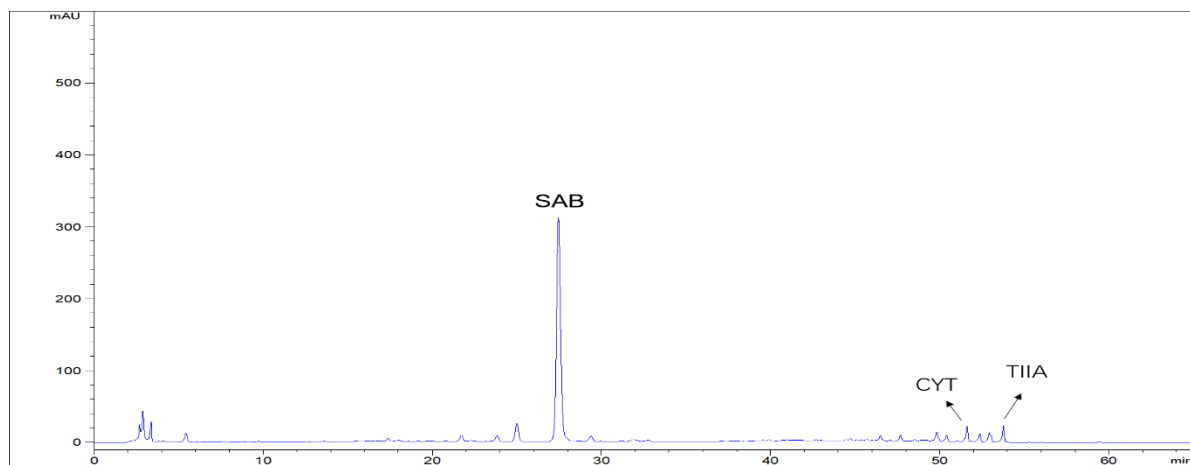

Figure S6. HPLC chromatograms of SM extracts using NaDES-15 (L-Pro-Lac, wavelength=280 nm)

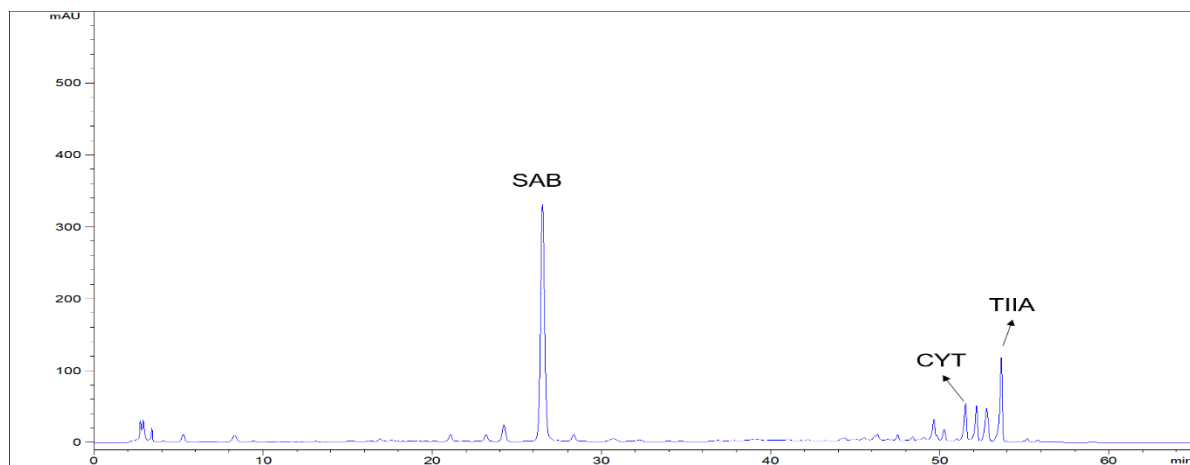

Supplement: molecules-25-00140-s001.pdf [file molecules-25-00140-s001.pdf]
